# Supplementary material
Source: PubMed Central journal article supplement (PMC4769623)
Supplement: supp_nsv120_scan-15-256-File008.pdf [file supp_nsv120_scan-15-256-File008.pdf]

## Supplementary Material: Questionnaire Items

Below are the 8 translated statements that were presented to the subjects after the fMRI experiment. The statements were rated on a 7-point scale ranging from 'Totally Disagree' to 'Totally Agree'.

1. I felt guilty when the other person made an error on a **difficult** trial that was caused **by me**.
2. I felt guilty when the other person made an error on a **normal** trial that was caused **by me**.
3. I felt guilty when the other person made an error on a **difficult** trial that was caused **by the computer**.
4. I felt guilty when the other person made an error on a **normal** trial that was caused **by the computer**.
5. I felt ashamed when the other person made an error on a **difficult** trial that was caused **by me**.
6. I felt ashamed when the other person made an error on a **normal** trial that was caused **by me**.
7. I felt ashamed when the other person made an error on a **difficult** trial that was caused **by the computer**.
8. I felt ashamed when the other person made an error on a **normal** trial that was caused **by the computer**.
