# Supplementary material
Source: PubMed Central journal article supplement (PMC4769623)
Supplement: supp_nsv120_scan-15-256-File009.pdf [file supp_nsv120_scan-15-256-File009.pdf]

**Supplementary material: T-score activation map of the Error > Correct contrast of the flanker execution task**

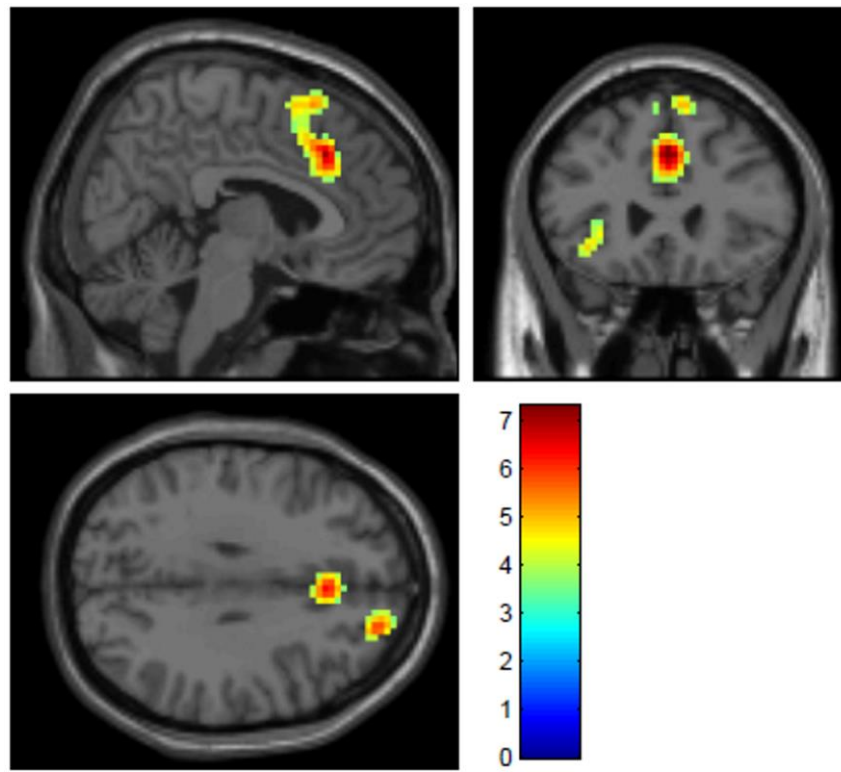

**Fig S1.** Sagittal ( $x = 6$ ), coronal ( $y = 27$ ), and axial ( $z = 31$ ) planes depicting t-score activation maps for the flanker execution task contrast Error > Correct.
