# Supplementary material
Source: PubMed Central journal article supplement (PMC4769623)
Supplement: supp_nsv120_scan-15-256-File010.pdf [file supp_nsv120_scan-15-256-File010.pdf]

**Supplementary material: flanker observation pattern in the AI separately for gender**

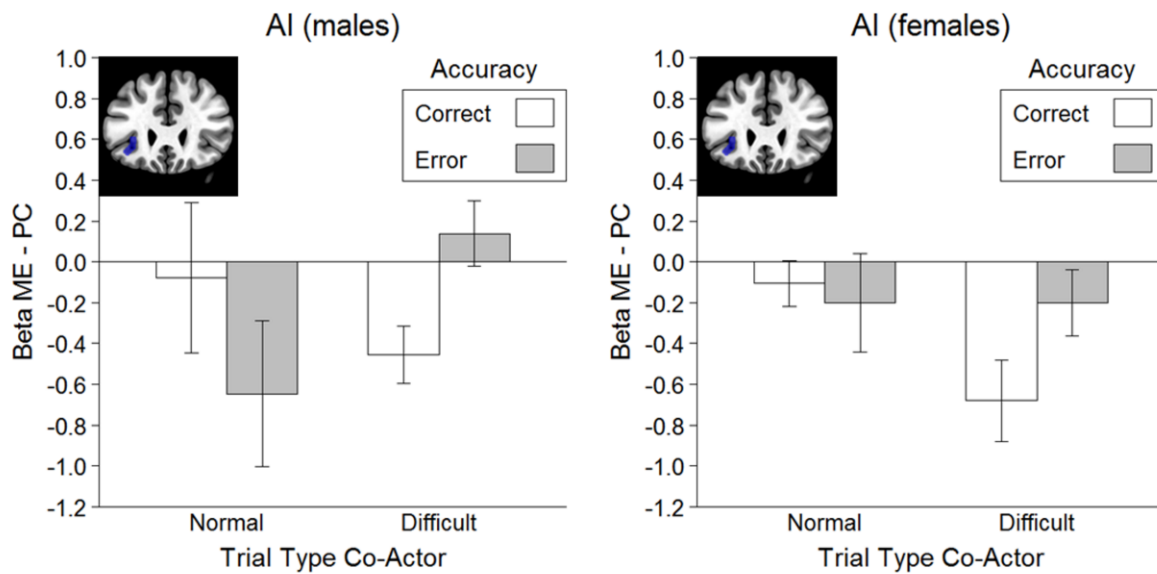

**Fig S2.** Results of the flanker observation task analysis for the AI ROI separately for males (N = 5) and females (N = 14). Each bar represents the difference score between the ME and the PC block (ME – PC) to control for the confounding influence of error likelihood. Error bars represent standard errors of the mean corrected for within subject designs according to Morey (2008).
